# Supplementary material
Source: publisher figshare collection journal article supplement (https://sage.figshare.com/ndownloader/files/17985833)
Supplement: Supplementary file 1 [file 17985833]

**Appendix Table A1.** List of Preoperative Variables Of Interest Used for the Correlation Analysis

| Preoperative Variable                         |                                                                         |
|-----------------------------------------------|-------------------------------------------------------------------------|
| Age                                           | -                                                                       |
| Sex                                           | Male/Female                                                             |
| Workers Compensation                          | Yes/No                                                                  |
| Running (Physical Activity)                   | Yes/No                                                                  |
| Involved in Sports/Physical Exercise)         | Yes/No                                                                  |
| Level of Competition                          | None/Recreational/High school/Collegiate/Semi-Professional/Professional |
| Body Mass Index                               | -                                                                       |
| Tobacco Smoker                                | None/Current/Past                                                       |
| History of Anxiety and/or Depression          | Yes/No                                                                  |
| Past Spine Surgery                            | Yes/No                                                                  |
| History of Back Pain                          | Yes/No                                                                  |
| Preoperative Duration of Hip Pain (in Months) | -                                                                       |
| Preoperative Chronic Pain( $\geq 2$ years)    | Yes/No                                                                  |
| Preoperative Alpha Angle                      | -                                                                       |
| Preoperative LCEA                             | -                                                                       |
| Preoperative Tonnis Angle                     | -                                                                       |
| Preoperative ACEA                             | -                                                                       |
| Tonnis Grade                                  | 0/1                                                                     |
| Preoperative HOS-ADL                          | -                                                                       |
| Preoperative HOS-SS                           | -                                                                       |
| Preoperative mHHS                             | -                                                                       |
| Preoperative iHOT-12                          | -                                                                       |
| Preoperative VAS Pain                         | -                                                                       |
| Surgical Side                                 | Left/Right                                                              |
| Type of Pain Onset                            | Insidious/Acute/Traumatic                                               |
| Preoperative Use of Physical Therapy          | Yes/No                                                                  |
| Preoperative Use of Chiropractor              | Yes/No                                                                  |
| Preoperative Hip Injections                   | Yes/No                                                                  |
| Preoperative Opioid Use                       | Yes/No                                                                  |
| Preoperative Limp                             | Yes/No                                                                  |
| Preoperative Hip Flexion                      | -                                                                       |
| Preoperative Hip External Rotation            | -                                                                       |
| Preoperative Hip Internal Rotation            | -                                                                       |
| Articular Cartilage Status                    | Normal/Mild/Moderate/Poor                                               |
| Chondromalacia Grade                          | None/Grade I/Grade II/ Grade III/ Grade IV                              |
| Femur Chondral Defects                        | None/ Grade I/ Grade II/ Grade III                                      |
| Cartilage Delamination                        | Yes/No                                                                  |
